# Supplementary material for: Impact of Loci Nature on Estimating Recombination and Mutation Rates in Chlamydia trachomatis
Source: Oxford University Press journal article supplement (doi:10.1534/g3.112.002923), 2012-07-01
Supplement: 761_tables1.pdf [file 761_tables1.pdf]

**Table S1 Oligonucleotide primers used for PCR and sequencing.**

| ORF <sup>a</sup>       | Primer <sup>a</sup>           | Primer sequence (5' to 3') <sup>a</sup> | Primer location <sup>a</sup> | Amplicon size (bp) <sup>a</sup> |
|------------------------|-------------------------------|-----------------------------------------|------------------------------|---------------------------------|
| CT048 ( <i>yraL</i> )  | CT048-1 <sup>b</sup>          | GAGCCGGCTCTTTTAAATGGTTT                 | 53104 - 53126                | 1059                            |
|                        | CT048-2 <sup>b</sup>          | GTCGACGGAACAGACGAAGAAA                  | 54141 - 54162                |                                 |
| CT050/CT051            | CT050/51-1A <sup>c, d</sup>   | TGGGCGCTGTTATTAACATTTG                  | 377806 - 377829              | 3704                            |
|                        | CT050/51-2A <sup>b, d</sup>   | GACCCCATCCCCTTTGGAGT                    | 381490 - 381509              |                                 |
|                        | CT050/51-1D <sup>b</sup>      | ACAAAGCGCTTTCAGAACATACAT                | 55452 - 55475                |                                 |
|                        | CT050/51-2D <sup>b</sup>      | AGGGCGTCTTTTCATGATTCTAT                 | 59017 - 59040                |                                 |
|                        | CT050/51-1 <sup>e</sup>       | CTAAGAGTTATGTAGCTATC                    | 55542 - 55561                |                                 |
|                        | CT050/51-1S <sup>e</sup>      | AGTTAAGGGAGAGAATCTC                     | 55593 - 55611                |                                 |
|                        | CT050/51-3 <sup>e</sup>       | TTGTAGTGTGCAAGATTGTC                    | 55857 - 55876                |                                 |
|                        | CT050/51-4 <sup>e</sup>       | TTGTGCCACTACAATACCTT                    | 58726 - 58745                |                                 |
|                        | CT050/51-5 <sup>e</sup>       | AACCTTTCCAATATCACCGT                    | 56566 - 56585                |                                 |
|                        | CT050/51-6 <sup>e</sup>       | GCACAGATCGCCAATATCAA                    | 58076 - 58095                |                                 |
|                        | CT050/51-7 <sup>e</sup>       | AGTCACTCCAGACAATTCTA                    | 57699 - 57718                |                                 |
|                        | CT050/51-8 <sup>e</sup>       | TTAGTGAGACAGGCATTGA                     | 57160 - 57178                |                                 |
|                        | CT058/CT059<br>( <i>fer</i> ) | CT058/9-1 <sup>b</sup>                  | AGTACCGGCCGAATCTCTTTCTCC     | 67315 - 67338                   |
| CT058/9-2 <sup>b</sup> |                               | GTCGGGGGTTTCAATCCCTCTA                  | 68927 - 68948                |                                 |
| CT058/9-3 <sup>e</sup> |                               | TCTCATTACTTCTTGCCT                      | 68432 - 68451                |                                 |
| CT147 <sup>f</sup>     | CT147-1 <sup>b</sup>          | GGGGAAAGTGAGCTCTTCGGTATC                | 165430 - 165453              | 2819                            |
|                        | CT147-2 <sup>b</sup>          | CGCCGCTACAACAGCTTTAGTGA                 | 168226 - 168248              |                                 |
|                        | CT147-3 <sup>b</sup>          | ATTGCGTCCAAGATATACGACAG                 | 167928 - 167951              | 2294                            |
|                        | CT147-4 <sup>b</sup>          | CACGCCAACCCAGAATCCTT                    | 170202 - 170221              |                                 |
|                        | CT147-5 <sup>e</sup>          | TAATCATCCACTAGAAGCG                     | 166229 - 166247              |                                 |
|                        | CT147-6 <sup>e</sup>          | TGTTCTAGCTGCTTTGAAT                     | 167649 - 167668              |                                 |
|                        | CT147-7 <sup>e</sup>          | TGGATGGTGTGAGAATTA                      | 168511 - 168530              |                                 |
|                        | CT147-8 <sup>e</sup>          | TACCTCTAGATGTTTTGCGT                    | 169786 - 169805              |                                 |
| CT192                  | CT192-1 <sup>b</sup>          | ATATGCGCAAGCACACCTTCC                   | 215717 - 215737              | 1016                            |
|                        | CT192-2 <sup>b</sup>          | CTGGGCGTCCATTCACAACA                    | 216713 - 216732              |                                 |
|                        | CT192-3 <sup>e</sup>          | CGTATCGATTCTTCTTCTA                     | 215998 - 216017              |                                 |
|                        | CT192-4 <sup>e</sup>          | CTCCTCTTATTGAAGAAGCT                    | 2156196 - 216215             |                                 |
| CT195                  | CT195-1 <sup>b</sup>          | CCTCCGCTAATCCTCGACTACAT                 | 219655 - 216678              | 1320                            |
|                        | CT195-2 <sup>b</sup>          | CCAGCGTTGATATTTCTTGATTA                 | 220951 - 220974              |                                 |
| CT214                  | CT214-1 <sup>b</sup>          | AGGGCTTCTATTCTCAAACAGTA                 | 241463 - 241486              | 1797                            |
|                        | CT214-2 <sup>b</sup>          | TTCCCGTTCTAAAGATCAGTTAT                 | 243236 - 243259              |                                 |
|                        | CT214-3 <sup>e</sup>          | AACAGCTGGATCTATATCA                     | 242027 - 242046              |                                 |
| CT223                  | CT223-1 <sup>b</sup>          | GCAACGCATATCGCTCCTCA                    | 251102 - 251121              | 1308                            |
|                        | CT223-2 <sup>b</sup>          | GTGCGCCCTTCTCGTAAAG                     | 252390 - 252409              |                                 |
| CT228/CT229            | CT228/9-1 <sup>b</sup>        | CGGTCCCGGATTATCAAACAAGT                 | 254667 - 254690              | 1816                            |
|                        | CT228/9-2 <sup>b</sup>        | ATGCGGCCATCCAGAAGC                      | 256464 - 256482              |                                 |
|                        | CT228/9-3 <sup>e</sup>        | AGATTACGCAAACGTTGCTC                    | 255033 - 255052              |                                 |

|                       |                        |                          |                 |      |
|-----------------------|------------------------|--------------------------|-----------------|------|
|                       | CT228/9-4 <sup>e</sup> | GTTGTGATTGCAGCAGTAG      | 255972 - 255990 |      |
| CT232/CT233           | CT232/3-1 <sup>b</sup> | GATTAGGCGGAGGGGTTCTCTT   | 259223 - 259244 | 1262 |
| ( <i>incB/incC</i> )  | CT232/3-2 <sup>b</sup> | CTCTCCGCGACGCAAATAAG     | 260464 - 260484 |      |
| CT249                 | CT249-1 <sup>b</sup>   | ACCACCCCTTAGCCATCCATCC   | 279170 - 279192 | 704  |
|                       | CT249-2 <sup>b</sup>   | AATTGCGCCGCCTCCTTGTA     | 279854 - 279873 |      |
| CT288                 | CT288-1 <sup>b</sup>   | TTTTACGCACAATGAACCCAGAAA | 321582 - 321605 | 2063 |
|                       | CT288-2 <sup>b</sup>   | CGGGCTCCTCGGGAACAG       | 323627 - 323644 |      |
|                       | CT288-3 <sup>e</sup>   | TTACCTGACCTCAGACACC      | 322164 - 322182 |      |
|                       | CT288-4 <sup>e</sup>   | GTCAGCTCGTCGTTTATTG      | 323121 - 323139 |      |
| CT293 ( <i>accD</i> ) | CT293-1 <sup>b</sup>   | TGCGCCAGAAGCTCCAGAAGTAGC | 326322 - 326345 | 1350 |
|                       | CT293-2 <sup>b</sup>   | AGGATCTGGCTGGGGATGGTTAGC | 327648 - 327671 |      |
| CT365                 | CT365-1 <sup>b</sup>   | AAATTCGCAAATTGCTCTTTTTTC | 416102 - 416125 | 2213 |
|                       | CT365-2 <sup>b</sup>   | GATCGGGATTCCCCTGGATA     | 418295 - 418314 |      |
|                       | CT365-3 <sup>e</sup>   | CTAACTCCAAGTTTCTCT       | 416572 - 416591 |      |
|                       | CT365-4 <sup>e</sup>   | CTCATTGCAGGTATTGTTGT     | 417720 - 417739 |      |
| CT442 ( <i>crpA</i> ) | CT442-1 <sup>b</sup>   | CTCCTCCCTTCCATACATCATCT  | 511256 - 511279 | 783  |
|                       | CT442-2 <sup>b</sup>   | AAGCGATTCTTCTCCGATACAT   | 512015 - 512038 |      |
| CT456 ( <i>tarp</i> ) | CT456-1 <sup>b</sup>   | ACAAACGTTACCCGGTATGCTGTT | 530723 - 530746 | 3362 |
|                       | CT456-2 <sup>b</sup>   | TTGCGCCTTGTCGATTGTGAT    | 534064 - 534084 |      |
|                       | CT456-3 <sup>e</sup>   | TACCTCATCAAGCGATCATA     | 531252 - 531271 |      |
|                       | CT456-4 <sup>e</sup>   | CCACCAGTTGTTATTATGTC     | 533470 - 533489 |      |
|                       | CT456-5 <sup>e</sup>   | AGACATGTCTCTTCTTCAT      | 531867 - 531886 |      |
|                       | CT456-6 <sup>e</sup>   | TACATCAGAGATTACGTCTC     | 532889 - 532908 |      |
|                       | CT456-7 <sup>e</sup>   | GAGTTTCATTGGAGAAGGAA     | 532413 - 532432 |      |
|                       | CT456-8 <sup>e</sup>   | CGTTACCCGGTATGCTGTT      | 530728 - 530746 |      |
|                       | CT456-9 <sup>e</sup>   | TACAAACACTACTGCCTTCA     | 533363 - 533382 |      |
|                       | CT456-10 <sup>e</sup>  | TTGTTACTACCTACGTCATC     | 531328 - 531347 |      |
|                       | CT456-11 <sup>e</sup>  | CTAATTAATCGGCTGTTG       | 530869 - 530887 |      |
| CT529                 | CT529-1 <sup>b</sup>   | ACGCGGCTCCTTAAAGCAAACAA  | 596464 - 596486 | 1659 |
|                       | CT529-2 <sup>b</sup>   | CGCGCATATCCGGGGAGTCT     | 598103 - 598122 |      |
|                       | CT529-3 <sup>e</sup>   | TCTCGCAAGCATTTCCTCT      | 596984 - 597003 |      |
| CT618                 | CT618-1 <sup>b</sup>   | TCCCGATATGCCTCCTTTGAGTC  | 698080 - 698103 | 1360 |
|                       | CT618-2 <sup>b</sup>   | ATGCGCACGCAAGCCAATC      | 699421 - 699439 |      |
| CT622                 | CT622-1 <sup>b</sup>   | GGCTCCCCCTCAATTCACAAACTT | 707046 - 707069 | 2319 |
|                       | CT622-2 <sup>b</sup>   | GGTCGCGGAAACCAATGAAATA   | 709342 - 709364 |      |
|                       | CT622-3 <sup>e</sup>   | TGATTGCTTGATTTTCGGCT     | 707784 - 707803 |      |
|                       | CT622-4 <sup>e</sup>   | TTCAGCATCGTCTCTGTAA      | 708885 - 708904 |      |
|                       | CT622-5 <sup>e</sup>   | AGAAGAGATTATGCAGAAGC     | 707298 - 707317 |      |
| CT623                 | CT623-1 <sup>b</sup>   | TTTGCCCATTAATAATTGGATTCA | 708957 - 708980 | 1516 |
|                       | CT623-2 <sup>b</sup>   | CATGGGTGCGTTGTATGAGATGT  | 710450 - 710472 |      |
| CT653 ( <i>yhbG</i> ) | CT653-1 <sup>b</sup>   | AGCCGCGATAGCTAACGAAGTG   | 750194 - 750215 | 922  |
|                       | CT653-2 <sup>b</sup>   | GAAGGCGGAATGAAAGTCCTCTC  | 751093 - 751115 |      |

|                                               |                        |                          |                          |      |                 |
|-----------------------------------------------|------------------------|--------------------------|--------------------------|------|-----------------|
| CT674 ( <i>yscC</i> )                         | CT674-1 <sup>b</sup>   | TTTCAAGCGGAATCGCAAGGAAT  | 770234 - 770256          | 3229 |                 |
|                                               | CT674-2 <sup>b</sup>   | CCGGGATCGAACCGACGAC      | 773444 - 773462          |      |                 |
|                                               | CT674-3 <sup>e</sup>   | AGAGCCATCAGATTTTCTCT     | 770846 - 770865          |      |                 |
|                                               | CT674-4 <sup>e</sup>   | AGAGGAAGAGAACTGAGTAA     | 772996 - 773015          |      |                 |
|                                               | CT674-5 <sup>e</sup>   | ATGACTTGAAAGTCGTTGAA     | 771470 - 771489          |      |                 |
|                                               | CT674-6 <sup>e</sup>   | TCCGTACATCATATCACTGA     | 772505 - 775524          |      |                 |
|                                               | CT674-7 <sup>e</sup>   | GATATCGGAGTCAATCTTGTT    | 772771 - 772791          |      |                 |
| CT675 ( <i>karG</i> )/                        | CT675/6-1 <sup>b</sup> | CCCGGCTTTGGGCATTCC       | 773458 - 773475          | 1933 |                 |
| CT676                                         | CT675/6-2 <sup>b</sup> | TCATTCCGGTAACAGGGGTTCCG  | 775369 - 775390          |      |                 |
|                                               | CT675/6-3 <sup>e</sup> | CGTGATCAGATTAATCAGCT     | 774669 - 774688          |      |                 |
| CT677/CT678/                                  | CT677/9-1 <sup>b</sup> | ATGGGGCCAGGACGGGTCTA     | 775420 - 775439          | 2393 |                 |
| CT679                                         | CT677/9-2 <sup>b</sup> | AAATTTTATCTCCGGTGCCTCTG  | 777789 - 777812          |      |                 |
| ( <i>frr</i> , <i>pyrH</i> , <i>tsf</i> )     | CT677/9-4 <sup>e</sup> | GAAGATATCACTGTACCAAC     | 776088 - 776107          |      |                 |
|                                               | CT677/9-5 <sup>e</sup> | TGGCTAAAGACATTGCTATG     | 777107 - 777126          |      |                 |
| CT682 ( <i>pbpB</i> ) <sup>†</sup>            | CT682-1 <sup>b</sup>   | GCATTGTGATCGCGCAGGAGTA   | 780841 - 780862          | 3149 |                 |
|                                               | CT682-2 <sup>b</sup>   | TTCCGCCTCTCCATAGTCGTTC   | 783966 - 783989          |      |                 |
|                                               | CT682-3 <sup>e</sup>   | TTGATAGGCAAGCGATCTAT     | 781484 - 781503          |      |                 |
|                                               | CT682-4 <sup>e</sup>   | ATATTCTCCAGGAAGTCCTA     | 783318 - 783337          |      |                 |
|                                               | CT682-5 <sup>e</sup>   | TGGAAATGTTTGAGTGTGAA     | 782079 - 782098          |      |                 |
| CT683 ( <i>TPR-</i><br><i>motif protein</i> ) | CT683-1 <sup>b</sup>   | TCGCTGCGGTAGGATATGAAGATG | 783756 - 783779          | 1702 |                 |
|                                               | CT683-2 <sup>b</sup>   | TCGCCGCGTAAATGAACCAAT    | 785437 - 785457          |      |                 |
|                                               | CT683-3 <sup>e</sup>   | GACTGTCAAACAGCCCTTAA     | 785108 - 785127          |      |                 |
| CT684 <sup>†</sup>                            | CT684-A1 <sup>b</sup>  | TGGGCATTACAATCTTGGGTTATG | 784615 - 784638          | 1471 |                 |
|                                               | CT684-A2 <sup>b</sup>  | AACAGCGGCATGCAGTTGATG    | 786065 - 786085          |      |                 |
|                                               | CT684-B1 <sup>b</sup>  | ATTCGGGAGGCAATCCACAAT    | 785785 - 785806          |      | 1398            |
|                                               | CT684-B2 <sup>b</sup>  | TCCCGGGAATCCATATACCTCTTC | 787159 - 787182          |      |                 |
|                                               | CT684-A3 <sup>e</sup>  | TCATCAATAGGGATGCCTAA     | 785651 - 785670          |      |                 |
|                                               | CT684-A4 <sup>e</sup>  | TCTGGATCTGCGTCTTCTAA     | 785609 - 785628          |      |                 |
|                                               | CT685/CT686            | CT685/6-1 <sup>b</sup>   | GCTCGGGAAGCAACCAAGTTATTA |      | 786722 - 786745 |
|                                               | CT685/6-2 <sup>b</sup> | AAGCGAGTCCCATGATACGAGAT  | 789084 - 789107          |      |                 |
|                                               | CT685/6-3 <sup>e</sup> | TCTTGATGTCGATGCTTTGA     | 787308 - 787327          |      |                 |
|                                               | CT685/6-4 <sup>e</sup> | ATGCAGAAGCTCGATTACTT     | 788502 - 788521          |      |                 |
| CT694                                         | CT694-1 <sup>b</sup>   | TACAGGGGGAGGCGCTTCCTTA   | 796071 - 796092          | 1541 |                 |
|                                               | CT694-2 <sup>b</sup>   | CGCGCTCTTCTAGCTCTCCCTCTT | 796528 - 797551          |      |                 |
|                                               | CT694-3 <sup>e</sup>   | GATAACTCTTAACCCCATG      | 796267 - 796286          |      |                 |
| CT760 ( <i>ftsW</i> )                         | CT760-1 <sup>b</sup>   | CTTGGGCCATTGCATTGAGTAAT  | 892695 - 892717          | 1417 |                 |
|                                               | CT760-2 <sup>b</sup>   | CCCCAGAGAACATCCGATTGAC   | 894090 - 894111          |      |                 |
|                                               | CT760-3 <sup>e</sup>   | AGGATGTAGGTAAACTTGCA     | 893445 - 893464          |      |                 |
| CT783                                         | CT783-1 <sup>b</sup>   | AGCGGGGATTGAGCATTCTT     | 919328 - 919347          | 1427 |                 |
|                                               | CT783-2 <sup>b</sup>   | TGCCCTCGCCTCTTCATC       | 920676 - 920694          |      |                 |
|                                               | CT783-3 <sup>e</sup>   | TGTCAATACCTTCCCTAGTT     | 919913 - 919932          |      |                 |
| CT813                                         | CT813-1 <sup>b</sup>   | CTGCGTGTGCTCTGGAAAATAAT  | 954988 - 955011          | 1460 |                 |

|                         |                         |                          |                   |      |
|-------------------------|-------------------------|--------------------------|-------------------|------|
|                         | CT813-2 <sup>b</sup>    | AGGCCGAGCCCTACTCAAAAAC   | 956365 - 956387   |      |
| CT818 ( <i>tyrP_2</i> ) | CT818-1 <sup>b</sup>    | CCTGGCGGGAAAGGGACTCT     | 961600 - 961619   | 1531 |
|                         | CT818-2 <sup>b</sup>    | GCGCATAATCGCGATCATAAATC  | 963107 - 963130   |      |
|                         | CT818-3 <sup>e</sup>    | GAATAGCACGTTTAACTCA      | 962512 - 962531   |      |
| CT852 ( <i>yhgN</i> )   | CT852-1 <sup>b</sup>    | CTGCCGACCAGCAAGGAT       | 1001213 - 1001231 | 768  |
|                         | CT852-2 <sup>b</sup>    | TAGGCGCTCAACTTCTGGTATCTG | 1001957 - 1001980 |      |
| CT859 ( <i>ispH</i> )/  | CT856/60-1 <sup>b</sup> | GAGGGGGCTTTGCGGATTAT     | 1011689 - 1011709 | 2779 |
| CT860                   | CT856/60-2 <sup>b</sup> | CCGGAATGCTTGGCTTGACA     | 1014448 - 1014467 |      |
|                         | CT856/60-3 <sup>e</sup> | ACGACATTGAGTATGGATGA     | 1012253 - 1012272 |      |
|                         | CT856/60-4 <sup>e</sup> | ACCCCGATATCTCATAAATC     | 1013829 - 1013848 |      |
|                         | CT856/60-5 <sup>e</sup> | GTATTCAGTTGCCAAGGA       | 1012658 - 1012677 |      |
| CT861/CT862             | CT861/2-1 <sup>c</sup>  | GAGGGCAGAGGCTTCTCACAAG   | 1014122 - 1014144 | 2400 |
| ( <i>lcrH_2</i> )       | CT861/2-2 <sup>b</sup>  | CTAGGCGTCCCAATTGGAGACTC  | 1016499 - 1016521 |      |
|                         | CT861/2-3 <sup>e</sup>  | AATAGCTCTCCAACCATCAA     | 1014640 - 1014659 |      |
|                         | CT861/2-4 <sup>e</sup>  | GACTATGAGGAAAGTTCTAC     | 1016071 - 1016090 |      |
|                         | CT861/2-5 <sup>e</sup>  | TCTCTGTTGCTATTGTTTG      | 1014159 - 1014178 |      |
|                         | CT861/2-6 <sup>e</sup>  | TTGACTTTCTCTGATGCTT      | 1015102 - 1015121 |      |
| CT867/CT868             | CT867/8-1 <sup>c</sup>  | TCCCAGCTGCTGGGGCTTAGA    | 1022902 - 1022922 | 2889 |
|                         | CT867/8-2 <sup>c</sup>  | CATCGCGTCATGCCATGTCCTAT  | 1025768 - 1025790 |      |
|                         | CT867/8-3 <sup>e</sup>  | TCCTTCAGCTACTCTGATT      | 1022935 - 1022953 |      |
|                         | CT867/8-4 <sup>e</sup>  | TGGTAAGCGGATTACAGAT      | 1023641 - 1023659 |      |
|                         | CT867/8-5 <sup>e</sup>  | TTCATGGCGTTCTACAGAAT     | 1024302 - 1024321 |      |
|                         | CT867/8-6 <sup>e</sup>  | AATGTCAGAATCCCAAGCA      | 1024923 - 1024941 |      |
|                         | CT867/8-7 <sup>e</sup>  | AGAGGGAAGTCTTAATTTCC     | 1025542 - 1025561 |      |

<sup>a</sup> Open reading frame (ORF) numbers, primer location (genome coordinates), primer sequences and amplicon size are based on the D/UW3 strain genome annotation (GenBank accession number NC\_000117).

<sup>b</sup> Amplification primers also used for automated sequencing.

<sup>c</sup> Primers exclusively used for PCR amplification.

<sup>d</sup> Primer sequences, location and amplicon size refers to the L2/434 strain genome annotation (GenBank accession number NC\_010287) as these primers were designed for amplification and automated sequencing in LGV and ocular strains, and they have no homology in the D/UW3 genome sequence.

<sup>e</sup> Primers exclusively used for automated sequencing.

<sup>f</sup> Due to the large gene size (for CT147 and CT682) or for PCR optimization (for CT684), two PCR primer pairs were designed to generate two overlapping amplicons for the entire gene. The primer pair for the amplification of the first region of the CT682 gene was previously described in Gomes et al. 2007 (data not shown).
