# Supplementary material for: Impact of Loci Nature on Estimating Recombination and Mutation Rates in Chlamydia trachomatis
Source: Oxford University Press journal article supplement (doi:10.1534/g3.112.002923), 2012-07-01
Supplement: 761_tables2.pdf [file 761_tables2.pdf]

**Table S2 List of the studied loci.**

| Loci <sup>a</sup>                    | Alleles Number <sup>b</sup> | $d_N/d_S > 1$<br>(Z-test; $p < 0,05$ ) <sup>c</sup> |
|--------------------------------------|-----------------------------|-----------------------------------------------------|
| IGR (CT044/CT045)                    | -                           |                                                     |
| IGR (CT047/CT048)                    | -                           |                                                     |
| CT048 ( <i>yraL</i> )                | 6                           |                                                     |
| IGR (CT048/CT049)                    | -                           |                                                     |
| CT049                                | 13                          |                                                     |
| CT050                                | 11                          |                                                     |
| CT051                                | 11                          |                                                     |
| CT058                                | 11                          |                                                     |
| IGR (CT058/CT059)                    | -                           |                                                     |
| CT059 ( <i>fer</i> )                 | 5                           |                                                     |
| CT115                                | 6                           |                                                     |
| IGR (CT115/CT116)                    | -                           |                                                     |
| CT116                                | 8                           | +                                                   |
| CT117                                | 7                           |                                                     |
| IGR (CT117/CT118)                    | -                           |                                                     |
| CT118                                | 5                           | +                                                   |
| IGR (CT118/CT119)                    | -                           |                                                     |
| CT121 ( <i>araD</i> ) <sup>d</sup>   | 3                           |                                                     |
| CT144                                | 9                           |                                                     |
| IGR (CT144/CT145)                    | -                           |                                                     |
| CT147 ( <i>EEA1</i> )                | 12                          |                                                     |
| IGR (CT191/CT192)                    | -                           |                                                     |
| CT192                                | 8                           |                                                     |
| IGR (CT192/CT193)                    | -                           |                                                     |
| CT195                                | 8                           |                                                     |
| CT209 ( <i>leuS</i> ) <sup>d,e</sup> | 5                           |                                                     |
| CT214                                | 8                           |                                                     |
| IGR (CT222/CT223)                    | -                           |                                                     |
| CT223                                | 11                          | +                                                   |
| IGR (CT223/CT224)                    | -                           |                                                     |
| CT228                                | 6                           | +                                                   |
| IGR (CT228/CT229)                    | -                           |                                                     |
| CT229                                | 7                           | +                                                   |
| IGR (CT229/CT230)                    | -                           |                                                     |
| IGR (CT231/CT232)                    | -                           |                                                     |
| CT232 ( <i>IncB</i> )                | 5                           |                                                     |
| IGR (CT232/CT233)                    | -                           |                                                     |
| CT233 ( <i>IncC</i> )                | 7                           |                                                     |
| IGR (CT233/CT234)                    | -                           |                                                     |
| CT245 ( <i>pdhA</i> ) <sup>d,e</sup> | 2                           |                                                     |

|                                      |    |   |
|--------------------------------------|----|---|
| IGR (CT248/CT249)                    | -  |   |
| CT249                                | 9  | + |
| IGR (CT287/CT288)                    | -  |   |
| CT288                                | 9  | + |
| IGR (CT288/CT289)                    | -  |   |
| IGR (CT292/CT293)                    | -  |   |
| CT293 ( <i>accD</i> )                | 4  |   |
| IGR (CT293/CT294)                    | -  |   |
| IGR (CT315/CT316)                    | -  |   |
| CT332 ( <i>pykF</i> ) <sup>d,e</sup> | 5  |   |
| CT365                                | 8  |   |
| IGR (CT365/CT366)                    | -  |   |
| CT376 ( <i>mdhC</i> ) <sup>d,e</sup> | 4  |   |
| CT412 ( <i>pmpA</i> )                | 10 |   |
| CT413 ( <i>pmpB</i> )                | 13 | + |
| IGR (CT413/CT414)                    | -  |   |
| CT414 ( <i>pmpC</i> )                | 13 |   |
| CT432 ( <i>glyA</i> ) <sup>d,e</sup> | 3  |   |
| IGR (CT441/CT442)                    | -  |   |
| CT442 ( <i>crpA</i> )                | 8  | + |
| IGR (CT442/CT443)                    | -  |   |
| CT443 ( <i>omcB</i> )                | 7  |   |
| CT456 ( <i>tarp</i> )                | 13 | + |
| CT505 ( <i>gapA</i> ) <sup>d</sup>   | 3  |   |
| CT529                                | 9  |   |
| IGR (CT529/CT530)                    | -  |   |
| CT618                                | 8  |   |
| IGR (CT618/CT619)                    | -  |   |
| CT622                                | 12 |   |
| IGR (CT622/CT623)                    | -  |   |
| CT623                                | 6  |   |
| IGR (CT624/CT625)                    | -  |   |
| IGR (CT652.1/CT653)                  | -  |   |
| CT653 ( <i>yhbG</i> ) <sup>e</sup>   | 3  |   |
| IGR (CT653/CT654)                    | -  |   |
| CT674 ( <i>yscC</i> )                | 11 |   |
| IGR (CT674/CT675)                    | -  |   |
| CT675 ( <i>karG</i> )                | 10 |   |
| CT676                                | 8  |   |
| IGR (CT676/CT677)                    | -  |   |
| CT677 ( <i>frr</i> )                 | 10 |   |
| CT678 ( <i>pyrH</i> )                | 10 |   |
| IGR (CT678/CT679)                    | -  |   |
| CT679 ( <i>tsf</i> )                 | 12 |   |

|                                      |    |   |
|--------------------------------------|----|---|
| CT680 ( <i>rs2</i> or <i>rpsB</i> )  | 12 |   |
| IGR (CT680/CT681)                    | -  |   |
| CT681 ( <i>ompA</i> )                | 15 |   |
| IGR (CT681/CT682)                    | -  |   |
| CT682 ( <i>pbpB</i> )                | 14 |   |
| IGR (CT682/CT683)                    | -  |   |
| CT683 ( <i>TPR-motif protein</i> )   | 7  |   |
| IGR (CT683/CT684)                    | -  |   |
| CT684                                | 6  |   |
| CT685                                | 5  |   |
| CT686                                | 9  |   |
| CT687 ( <i>yfhO_1</i> )              | 5  |   |
| IGR (CT687/CT688)                    | -  |   |
| CT688 ( <i>parB</i> )                | 8  |   |
| CT689 ( <i>dppF</i> )                | 6  |   |
| CT690 ( <i>dppD</i> ) <sup>d</sup>   | 6  |   |
| CT694                                | 10 | + |
| IGR (CT698/CT699)                    | -  |   |
| CT713 ( <i>porB</i> ) <sup>d</sup>   | 4  |   |
| 16SrRNA                              | 6  |   |
| IGR (CT759/CT760)                    | -  |   |
| CT760 ( <i>ftsW</i> )                | 6  |   |
| CT781 ( <i>lysS</i> ) <sup>d,e</sup> | 4  |   |
| IGR (CT782/CT783)                    | -  |   |
| CT783                                | 8  |   |
| IGR (CT783/CT784)                    | -  |   |
| IGR (CT796/CT797)                    | -  |   |
| CT812 ( <i>pmpD</i> )                | 10 |   |
| IGR (CT812/CT813)                    | -  |   |
| CT813                                | 7  | + |
| IGR (CT813/CT814)                    | -  |   |
| IGR (CT817/CT818)                    | -  |   |
| CT818 ( <i>tyrP_2</i> )              | 9  |   |
| IGR (CT818/CT819)                    | -  |   |
| IGR (CT851/CT852)                    | -  |   |
| CT852 ( <i>yhgN</i> )                | 9  |   |
| IGR (CT852/CT853)                    | -  |   |
| CT859 ( <i>ispH</i> )                | 6  |   |
| IGR (CT859/CT860)                    | -  |   |
| CT860                                | 10 |   |
| IGR (CT860/CT861)                    | -  |   |
| CT861                                | 7  |   |
| IGR (CT861/CT862)                    | -  |   |
| CT862 ( <i>lcrH_2</i> )              | 3  |   |

|                       |    |   |
|-----------------------|----|---|
| CT867                 | 10 | + |
| CT868                 | 13 | + |
| CT869 ( <i>pmpE</i> ) | 11 |   |
| CT870 ( <i>pmpF</i> ) | 9  |   |
| IGR (CT870/CT871)     | -  |   |
| CT871 ( <i>pmpG</i> ) | 12 |   |
| CT872 ( <i>pmpH</i> ) | 10 |   |
| CT874 ( <i>pmpI</i> ) | 12 |   |

<sup>a</sup> Open reading frame (ORF) numbers are based on the D/UW3 strain genome annotation (GenBank accession number NC\_000117).

<sup>b</sup> Number of alleles that each gene assigns were determined based on MEGA5 evolutionary analysis (distance matrices and phylogenetic trees) of each gene (for more details see the Materials and Methods section).

<sup>c</sup> Genes putatively under positive selection that compose the PSG data set (Joseph et al. 2011; Borges V, Nunes A, Ferreira R, Borrego MJ, Gomes JP, unpublished data)..

<sup>d</sup> For these genes, the partial sequences available at the GenBank were used.

<sup>e</sup> Genes that constitute a previously defined MLST scheme for *Chlamydia trachomatis* molecular characterization (Dean et al. 2009).

The partial sequences used for typing purposes compose the HK-MLST data set.
