# Supplementary material for: Impact of Loci Nature on Estimating Recombination and Mutation Rates in Chlamydia trachomatis
Source: Oxford University Press journal article supplement (doi:10.1534/g3.112.002923), 2012-07-01
Supplement: 761_tables4.pdf [file 761_tables4.pdf]

**Table S4 Accuracy results and  $r/m$  and  $\rho/\theta$  estimates for all loci data sets.**

| Loci Data Sets    | Accuracy Assessments    |                                                                |             | ClonalFrame Results    |                     |                                |                     |
|-------------------|-------------------------|----------------------------------------------------------------|-------------|------------------------|---------------------|--------------------------------|---------------------|
|                   | Trees concordance score | Gelman-Rubin test                                              |             | $r/m$ (mean; [95% CI]) |                     | $\rho/\theta$ (mean; [95% CI]) |                     |
|                   |                         | Test statistics                                                | Convergence | 1 <sup>st</sup> run    | 2 <sup>nd</sup> run | 1 <sup>st</sup> run            | 2 <sup>nd</sup> run |
| Wide genomic      | 3                       | 1.00 ( $\theta$ , $v$ , $\delta$ ); 0.99 (R)                   | +           | 0.21; [0.18-0.25]      | 0.21; [0.18-0.24]   | 0.01; [0.01-0.01]              | 0.01; [0.01-0.01]   |
| HK-MLST           | 2.875                   | 1.00 ( $\theta$ , $v$ , $\delta$ , R)                          | +           | 0.91; [0.05-3.95]      | 1.09; [0.07-5.02]   | 0.12; [0.004-0.42]             | 0.14; [0.01-0.58]   |
| 1 to 5 alleles    | 2.667                   | 1.00 ( $\theta$ , $\delta$ , R); 0.99 ( $v$ )                  | +           | 4.77; [1.77-10.72]     | 5.09; [1.76-12.36]  | 0.91; [0.27-2.27]              | 1.02; [0.27-2.87]   |
| 6 and 7 alleles   | 2.7                     | 1.00 ( $\delta$ , R); 0.99 ( $\theta$ , $v$ )                  | +           | 7.04; [3.45-12.67]     | 6.98; [3.47-12.57]  | 0.89; [0.42-1.71]              | 0.87; [0.41-1.62]   |
| 8 and 9 alleles   | 2.643                   | 1.04 ( $\theta$ ); 1.15 (R); 1.58 ( $v$ ); 1.23 ( $\delta$ )   | -           | 2.38; [1.54-3.65]      | 2.44; [1.55-3.77]   | 0.21; [0.12-0.33]              | 0.21; [0.12-0.33]   |
| 10 and 11 alleles | 2.786                   | 1.13 ( $\theta$ ); 1.21 (R); 1( $v$ ); 1.28 ( $\delta$ )       | -           | 3.41; [0.47-5.21]      | 4.12; [3.09-5.38]   | 0.27; [0.03-0.41]              | 0.35; [0.27-0.45]   |
| 12 to 15 alleles  | 2.714                   | 6.51 ( $\theta$ ); 1(R); 16.99 ( $v$ ); 1.02 ( $\delta$ )      | -           | 0.58; [0.3-0.96]       | 0.29; [0.21-0.38]   | 0.03; [0.01-0.05]              | 0.01; [0.01-0.01]   |
| PSG               | 2.357                   | 2.70 ( $\theta$ ); 1.73 (R); 37.74 ( $v$ ); 11.45 ( $\delta$ ) | -           | 0.05; [0.02-0.1]       | 3.15; [1.6-5.31]    | 0.08; [0.05-0.13]              | 0.39; [0.2-0.7 ]    |
| IGR               | 2.769                   | 1.00 ( $\theta$ , $v$ , $\delta$ , R)                          | +           | 1.38; [0.82-2.17]      | 1.38; [0.8-2.19]    | 0.3; [0.17-0.48]               | 0.29; [0.17-0.47]   |

**CI** – Confidence interval;  **$\theta$**  – mutation rate;  **$v$**  – rate of new polymorphism introduced by recombination;  **$\delta$**  – average tract length of a recombination event; **R** – recombination rate;  **$r/m$**  – measure of the weight of recombination on the diversification relative to mutation;  **$\rho/\theta$**  – measure of the frequency of occurrence of recombination relative to mutation events.
