# Supplementary material for: Impact of Loci Nature on Estimating Recombination and Mutation Rates in Chlamydia trachomatis
Source: PubMed Central journal article supplement (PMC3385982; doi:10.1534/g3.112.002923), 2012-07-01
Supplement: supp_2.7.761_TableS3.pdf [file supp_2.7.761_TableS3.pdf]

**Table S3** Contingency table for estimating the significance of the polymorphism present in the loci studied.

|              | Inside Region (bp) <sup>a</sup> | Outside Region (bp) |                      |
|--------------|---------------------------------|---------------------|----------------------|
| SNPs         | 1802                            | 1552                | 3354 <sup>b</sup>    |
| Without SNPs | 112530                          | 926635              | 1039165              |
|              | 114332                          | 928187              | 1042519 <sup>c</sup> |

<sup>a</sup> Chromosomal region evaluated in the present study (composed by the 136 genomic regions: 80 genes and 56 intergenic regions). <sup>b</sup>

Total number of SNPs identified between the *Chlamydia trachomatis* serovars A/Har13 (NC\_007429) and D/UW3 (NC\_000117)

(Carlson et al. 2005).<sup>c</sup> Total length of the chromosome of *C. trachomatis* serovar D/UW3 (NC\_000117). The polymorphism

significance ( $p < 10^{-7}$ ) of the analyzed regions was calculated using the Fisher's exact test.
